# Supplementary material for: Policies to Create Healthier Food Environments in Canada: Experts’ Evaluation and Prioritized Actions Using the Healthy Food Environment Policy Index (Food-EPI)
Source: MDPI journal article supplement (doi:10.3390/ijerph16224473), 2019-11-14
Supplement: s1 [file s1]

## Supplemental Material

Policies to create healthier food environments in Canada: Experts' evaluation and prioritized actions using the Healthy Food Environment Policy Index

**Table S1.** Indicators and good practice statements used in the Canadian Food-EPI per governmental jurisdiction, Food-EPI Canada, 2017.

| Food-EPI Indicator | Abbreviated Indicator name                    | Abbreviated Good Practice Statement                                                                                                                                                                                                                                         | Regulatory Jurisdiction in Canada |                        |
|--------------------|-----------------------------------------------|-----------------------------------------------------------------------------------------------------------------------------------------------------------------------------------------------------------------------------------------------------------------------------|-----------------------------------|------------------------|
|                    |                                               |                                                                                                                                                                                                                                                                             | Federal                           | Provincial/Territorial |
| Policy Component   |                                               |                                                                                                                                                                                                                                                                             |                                   |                        |
| COMP1              | Composition targets for packaged foods        | Food composition targets for processed foods for nutrients of concern in certain foods or food groups are in place                                                                                                                                                          | X                                 |                        |
| COMP2              | Composition targets for out-of-home foods     | Food composition targets for out-of-home meals in food service outlets for nutrients of concern in certain foods or food groups are in place                                                                                                                                | X                                 | X                      |
| LABEL1             | Nutrition information on labels               | Ingredient lists and nutrient declarations (including warning labels) in line with Codex recommendations are present on the labels of all packaged foods                                                                                                                    | X                                 |                        |
| LABEL2             | Health claim regulations                      | Regulatory systems are in place for approving/reviewing claims on foods to protect consumers against unsubstantiated and misleading nutrition and health claims                                                                                                             | X                                 |                        |
| LABEL3             | Front-of-package food labelling               | A single, consistent, interpretive, evidence-informed front-of-pack (FOP) supplementary nutrition information system is applied to all packaged foods                                                                                                                       | X                                 |                        |
| LABEL4             | Menu labelling                                | A consistent, single, simple, clearly-visible system of labelling the menu boards of all quick service restaurants (e.g., fast food chains) is applied by the government, which allows consumers to interpret the nutrient quality and/or energy content of foods and meals | X                                 | X                      |
| PROMO1             | Promotion to children via broadcast media     | Policies restrict exposure and power of promotion of unhealthy foods to children through broadcast media (TV, radio)                                                                                                                                                        | X                                 | X                      |
| PROMO2             | Promotion to children via non-broadcast media | Policies restrict exposure and power of promotion of unhealthy foods to children through non-broadcast media (e.g. Internet, social media, food packaging, sponsorship, outdoor and public transport advertising)                                                           | X                                 | X                      |
| PROMO3             | Promotion to children in children's settings  | Policies restrict promotion of unhealthy foods to children in settings where children gather (e.g. preschools, schools, sport and cultural events)                                                                                                                          | X                                 | X                      |
| PRICE1             | Minimize taxes on healthy foods               | Taxes on healthy foods are minimised to encourage healthy food choices where possible                                                                                                                                                                                       | X                                 | X                      |

|                                         |                                                  |                                                                                                                                                                                                                      |   |   |
|-----------------------------------------|--------------------------------------------------|----------------------------------------------------------------------------------------------------------------------------------------------------------------------------------------------------------------------|---|---|
| PRICE2                                  | Increase taxes on unhealthy foods                | Taxes on unhealthy foods are in place and increase the retail prices of these foods by at least 10% to discourage unhealthy food choices where possible, and these taxes are reinvested to improve population health | X | X |
| PRICE3                                  | Subsidies on foods                               | Existing subsidies on foods favour healthy rather than unhealthy foods                                                                                                                                               | X | X |
| PRICE4                                  | Food-related income support                      | The government ensures that food-related income support programs are for healthy foods                                                                                                                               | X | X |
| PROV1                                   | School nutrition policies                        | Clear, consistent policies in schools and early childhood education and care services for food service activities provide and promote healthy food choices                                                           | X | X |
| PROV2                                   | Public sector nutrition policies                 | Clear, consistent policies in public sector settings for food service activities provide and promote healthy food choices                                                                                            | X | X |
| PROV3                                   | Support for nutrition policies                   | Good support and training systems to help schools and other public sector organisations and their caterers meet the healthy food service policies and guidelines                                                     |   | X |
| PROV4                                   | Private company nutrition policies               | Government actively encourages and supports private companies to provide and promote healthy foods and meals in their workplaces                                                                                     | X | X |
| RETAIL1                                 | Planning policies for unhealthy food outlets     | Zoning laws provide robust mechanisms to place limits on the density or placement of outlets selling mainly unhealthy foods in communities                                                                           | X | X |
| RETAIL2                                 | Planning policies for healthy food outlets       | Zoning laws provide robust mechanisms to encourage the availability of outlets selling fresh fruit and vegetables                                                                                                    | X | X |
| RETAIL3                                 | Food availability in food stores                 | Support systems encourage food stores to promote the in-store availability of healthy foods and to limit the in-store availability of unhealthy foods                                                                | X | X |
| RETAIL4                                 | Food availability and promotion in restaurants   | Support systems encourage food service outlets to increase the promotion and availability of healthy foods and to decrease the promotion and availability of unhealthy foods                                         | X | X |
| TRADE1                                  | Risk impact assessments                          | Risk impact assessments before and during the negotiation of trade and investment agreements identify and evaluate the impacts of agreements on population nutrition and health                                      | X |   |
| TRADE2                                  | Manage and protect regulatory capacity           | The government adopts measures to manage investment and protect their regulatory capacity with respect to public health nutrition                                                                                    | X |   |
| <b>Infrastructure Support Component</b> |                                                  |                                                                                                                                                                                                                      |   |   |
| LEADERSHIP1                             | Political support                                | There is strong, visible, political support for improving food environments, population nutrition, diet-related NCDs and related inequalities                                                                        | X | X |
| LEADERSHIP2                             | Population intake targets                        | Clear population intake targets for the nutrients of concern have been established                                                                                                                                   | X | X |
| LEADERSHIP3                             | Dietary guidelines                               | Clear, interpretive, evidence-informed food-based dietary guidelines have been established and implemented                                                                                                           | X |   |
| LEADERSHIP4                             | Implementation plan to improve food environments | There is a comprehensive, transparent, up-to-date implementation plan to improve food environments, reduce the intake of the nutrients of concern, and reduce diet-related NCDs                                      | X | X |
| LEADERSHIP5                             | Priorities for inequalities                      | Government priorities to reduce inequalities or protect vulnerable populations in relation to diet, nutrition, obesity and NCDs have been established                                                                | X | X |

|             |                                                    |                                                                                                                                                                                                                        |   |   |
|-------------|----------------------------------------------------|------------------------------------------------------------------------------------------------------------------------------------------------------------------------------------------------------------------------|---|---|
| GOVERNANCE1 | Restrict commercial influence                      | Procedures to restrict commercial influences on the development of policies related to food environments where they have conflicts of interest are in place                                                            | X | X |
| GOVERNANCE2 | Evidence in policymaking                           | Policies and procedures for using evidence in the development of food policies are in place                                                                                                                            | X | X |
| GOVERNANCE3 | Transparency in policy development                 | Policies and procedures are implemented for ensuring transparency in the development of food policies                                                                                                                  | X | X |
| GOVERNANCE4 | Public access to information                       | The government ensures public access to comprehensive information and key documents (e.g. budget documents, annual performance reviews and health indicators) related to public health nutrition and food environments | X | X |
| MONIT1      | Monitoring food environments                       | Monitoring systems regularly monitor food environments                                                                                                                                                                 | X | X |
| MONIT2      | Monitoring population intakes                      | There is regular monitoring of adult and childhood nutrition status and population intakes against specified intake targets or recommended daily intake levels                                                         | X | X |
| MONIT3      | Monitoring overweight and obesity                  | There is regular monitoring of adult and childhood overweight and obesity prevalence using anthropometric measurements                                                                                                 | X | X |
| MONIT4      | Monitoring NCD prevalence and risk factors         | There is regular monitoring of the prevalence of NCD risk factors and occurrence rates (e.g. prevalence, incidence, mortality) for the main diet-related NCDs                                                          | X | X |
| MONIT5      | Evaluation of programs and policies                | Evaluation of major programs and policies to assess effectiveness and contribution to achieving the nutrition and health goals                                                                                         | X | X |
| MONIT6      | Monitoring health inequalities                     | Regular monitoring of progress towards reducing health inequalities or health impacts in vulnerable populations and social determinants of health                                                                      | X | X |
| FUNDING1    | Sufficient population nutrition budget             | The 'population nutrition' budget, as a proportion of total health spending and/or in relation to the diet-related NCD burden is sufficient to reduce diet-related NCDs                                                | X | X |
| FUNDING2    | Government-funded research                         | Government funded research is targeted for improving food environments, reducing obesity, NCDs and their related inequalities                                                                                          | X | X |
| FUNDING3    | Health promotion agency                            | There is a statutory health promotion agency in place that includes an objective to improve population nutrition                                                                                                       | X | X |
| PLATFORMS1  | Coordination mechanism across government           | Coordination mechanisms across departments and levels of government (national and state) to ensure policy coherence, alignment, and integration of food-related policies across governments                            | X | X |
| PLATFORMS2  | Coordination mechanism with commercial food sector | There are formal platforms between government and the commercial food sector to implement healthy food policies                                                                                                        | X | X |
| PLATFORMS3  | Coordination mechanism with civil society          | There are formal platforms for regular interactions between government and civil society on food policies and other strategies to improve population nutrition                                                         | X | X |
| PLATFORMS4  | Systems-based approach with local organizations    | Broad, coherent, effective, integrated and sustainable systems-based approach with local organisations to improve food environments at a national level                                                                | X |   |

|       |                                                |                                                                                                                                                                                                                  |   |   |
|-------|------------------------------------------------|------------------------------------------------------------------------------------------------------------------------------------------------------------------------------------------------------------------|---|---|
| HIAP1 | Health considerations in all food policies     | Population nutrition, health outcomes and reducing health inequalities or health impacts in vulnerable populations are considered and prioritised in the development of all government policies relating to food | X | X |
| HIAP2 | Health impact assessments in non-food policies | There are processes (e.g. HIAs) to assess and consider health impacts during the development of other non-food policies                                                                                          | X | X |

**For each indicator, you will see a screen like this:**

## POLICY AREA: FOOD COMPOSITION

**Food-EPI vision statement:** There are government systems implemented to ensure that, where practicable, processed foods and out-of-home meals minimize the energy density and the nutrients of concern (salt, saturated fat, trans fat, added sugar)

### COMP2. Food composition targets/standards/restrictions for out-of-home meals

**Food-EPI good practice statement:** The government has established food composition targets/standards for out-of-home meals in food service outlets for the content of the nutrients of concern in certain foods or food groups if they are major contributors to population intakes of these nutrients of concern (trans fats, added sugars, salt, saturated fat)

### INTERNATIONAL EXAMPLES:

- **New York City, USA:** In 2006, New York City's Health Code was amended to restrict the amount of *trans*-fats to a maximum of 0.5g in food served by all food service establishments. Violators are subject to fines up to \$2,000.00. Other US cities have since banned restaurants from serving *trans*-fats.
- **New York City, USA:** In 2009, New York City established voluntary salt guidelines for various restaurant and store-bought foods, which evolved into the National Salt Reduction Initiative to reduce excess sodium by 25% in packaged and restaurant foods.
- **New Zealand:** In New Zealand, The Chip group, funded 50% by the Ministry of Health and 50% by industry, set an industry standard for deep frying oils to maximum 28% saturated fat, 3% linoleic acid and 1% of *trans*-fat for deep-fried chips.
- **The Netherlands:** In 2014, the Dutch Ministry of Health, Welfare and Sport signed an agreement with trade organizations representing food manufacturers, supermarkets, hotels, restaurants, caterers and the hospitality industry to lower the levels of salt, saturated fat, calories in food products and increase the healthiness of the food supply by 2020.

### CONTEXT:

While regulations for packaged food are primarily based at the federal level, composition targets or standards for restaurant foods can potentially fit within the mandate of provincial or territorial governments.

### POLICY DETAILS:

There are no food standards for out-of-home meals at the provincial level in Ontario.

The **Food-EPI vision statement** is a theoretical vision for what we might hope policy can achieve in each policy domain.

This is the definition of the good practice indicator you will be rating

These are the international best practice examples or benchmarks where countries are doing particularly well in policy areas. This is what you will rate the provincial policy against.

This is a summary of any relevant context and the current evidence of implementation in the province.

**Figure S1.** Image of the introductory screen provided for online ratings, Food-EPI Canada, 2017.

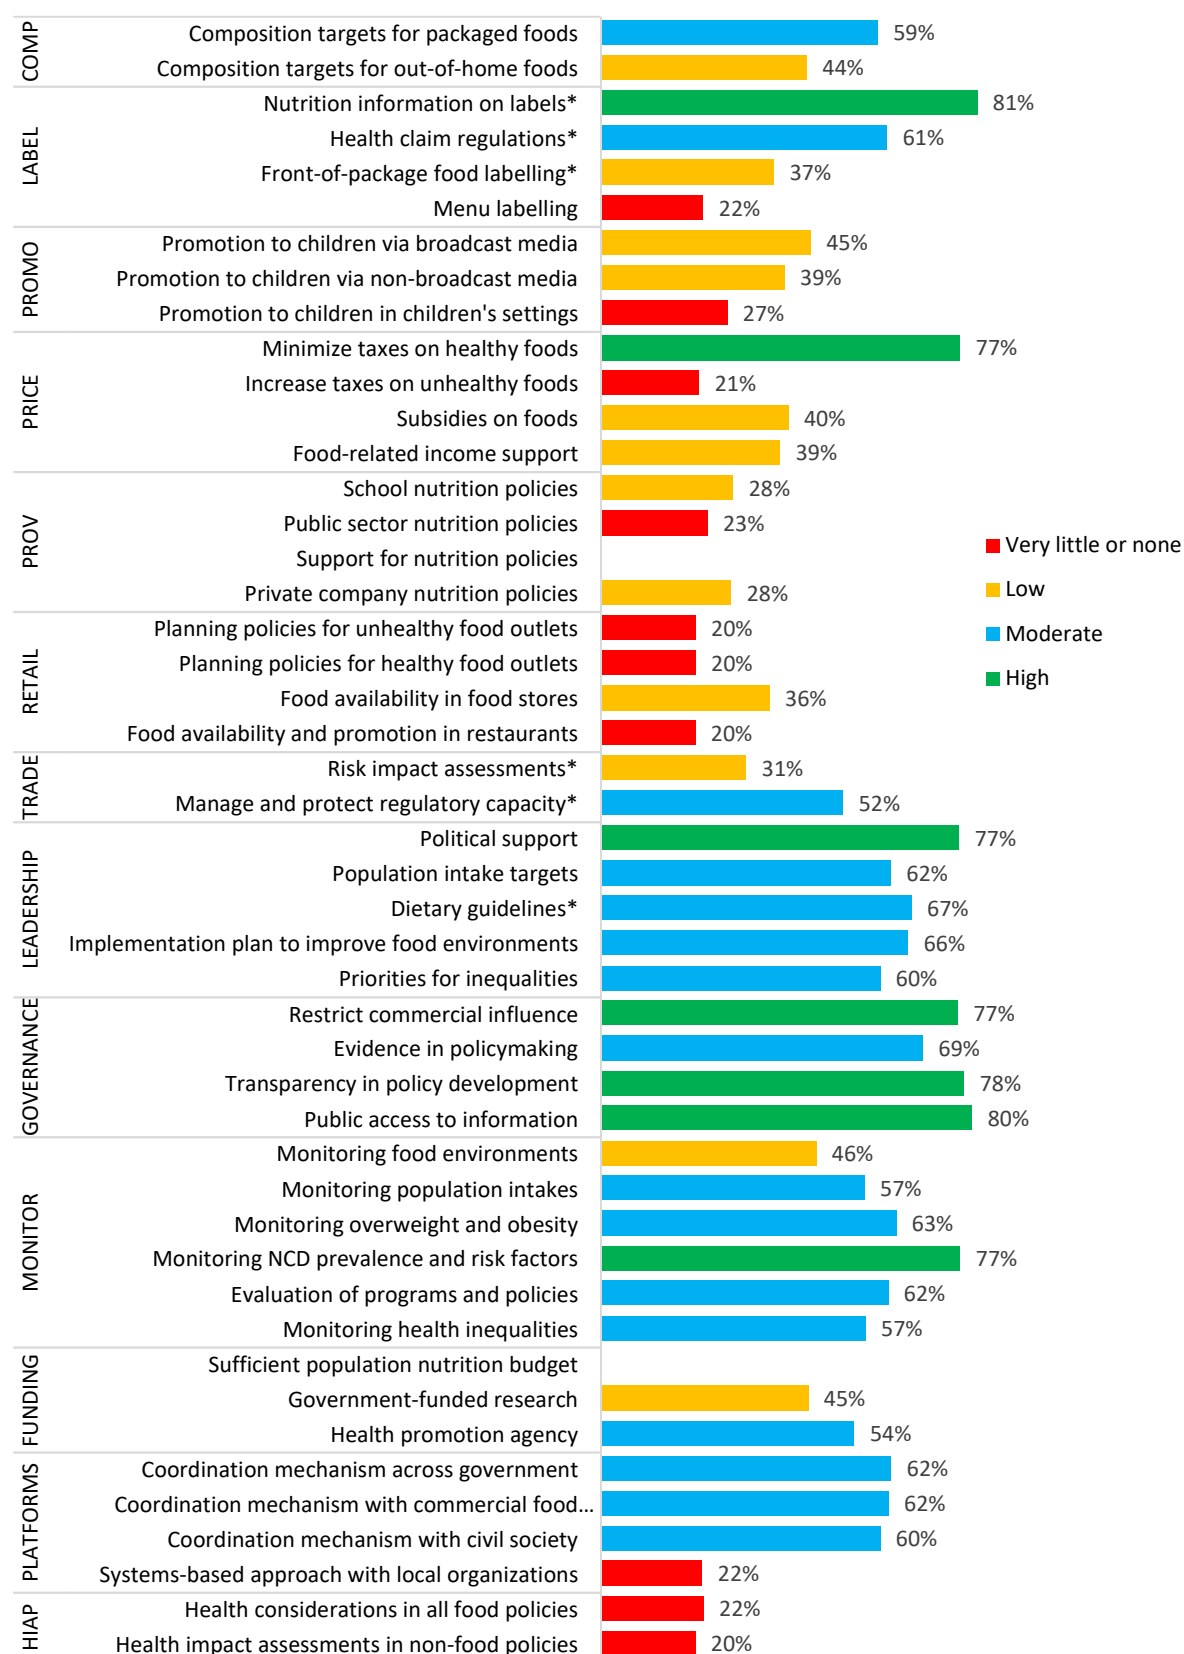

\* indicates indicators that were only rated at the federal level

**Figure S2.** Ratings for federal government only for 45 indicators, Food-EPI Canada, 2017.

| Indicator                                      | AB  | BC  | MB  | NB  | NL  | NS  | NWT | ON  | PEI | QC  | SK  | YK  |
|------------------------------------------------|-----|-----|-----|-----|-----|-----|-----|-----|-----|-----|-----|-----|
| Composition targets for out-of-home foods      | 33% | 64% | 20% | 20% | 20% | 20% | 20% | 20% | 20% | 54% | 20% | 20% |
| Menu labelling                                 | 20% | 44% | 24% | 20% | 20% | 20% | 20% | 83% | 20% | 20% | 20% | 20% |
| Promotion to children via broadcast media      | 20% | 23% | 20% | 32% | 20% | 20% | 20% | 23% | 20% | 97% | 20% | 20% |
| Promotion to children via non-broadcast media  | 26% | 20% | 20% | 20% | 20% | 20% | 20% | 23% | 20% | 87% | 20% | 20% |
| Promotion to children in children's settings   | 20% | 27% | 28% | 56% | 27% | 57% | 20% | 20% | 50% | 80% | 25% | 20% |
| Minimize taxes on healthy foods                | 83% | 83% | 83% | 83% | 83% | 83% | 83% | 83% | 83% | 83% | 83% | 83% |
| Increase taxes on unhealthy foods              | 20% | 20% | 20% | 20% | 20% | 20% | 33% | 20% | 20% | 49% | 20% | 33% |
| Subsidies on foods                             | 49% | 40% | 55% | 20% | 27% | 47% | 80% | 54% | 20% | 73% | 20% | 30% |
| Food-related income support                    | 40% | 40% | 40% | 44% | 57% | 30% | 26% | 43% | 27% | 57% | 28% | 20% |
| School nutrition policies                      | 74% | 77% | 80% | 80% | 57% | 87% | 80% | 77% | 47% | 63% | 52% | 40% |
| Public sector nutrition policies               | 69% | 73% | 32% | 52% | 50% | 70% | 47% | 46% | 24% | 74% | 24% | 37% |
| Support for nutrition policies                 | 86% | 73% | 76% | 76% | 73% | 83% | 80% | 83% | 57% | 54% | 36% | 43% |
| Private company nutrition policies             | 73% | 63% | 32% | 36% | 47% | 20% | 20% | 33% | 37% | 43% | 20% | 44% |
| Planning policies for unhealthy food outlets   | 40% | 28% | 50% | 28% | 23% | 27% | 20% | 23% | 23% | 23% | 20% | 27% |
| Planning policies for healthy food outlets     | 23% | 23% | 20% | 44% | 50% | 20% | 23% | 20% | 20% | 20% | 20% | 20% |
| Food availability in food stores               | 20% | 20% | 20% | 28% | 43% | 20% | 20% | 20% | 20% | 57% | 20% | 20% |
| Food availability and promotion in restaurants | 20% | 20% | 20% | 20% | 20% | 23% | 20% | 20% | 20% | 46% | 20% | 20% |
| Political support                              | 31% | 37% | 20% | 45% | 57% | 30% | 51% | 51% | 30% | 43% | 20% | 20% |
| Population intake targets                      | 43% | 56% | 44% | 44% | 53% | 30% | 34% | 37% | 30% | 31% | 20% | 40% |
| Strategy/plan to improve food environments     | 34% | 73% | 52% | 52% | 70% | 67% | 31% | 83% | 56% | 49% | 32% | 63% |
| Priorities for inequalities                    | 31% | 27% | 65% | 68% | 80% | 37% | 54% | 46% | 40% | 57% | 20% | 57% |
| Restrict commercial influence                  | 71% | 63% | 40% | 48% | 63% | 87% | 54% | 60% | 43% | 53% | 24% | 60% |
| Evidence in policymaking                       | 51% | 20% | 56% | 36% | 67% | 23% | 20% | 60% | 23% | 29% | 20% | 33% |
| Transparency in policy development             | 43% | 57% | 40% | 70% | 73% | 43% | 60% | 80% | 40% | 47% | 20% | 20% |
| Public access to information                   | 91% | 91% | 91% | 91% | 91% | 91% | 91% | 91% | 91% | 91% | 91% | 91% |
| Monitoring food environments                   | 51% | 20% | 20% | 48% | 37% | 20% | 20% | 20% | 23% | 63% | 40% | 27% |
| Monitoring population intakes                  | 70% | 67% | 60% | 80% | 50% | 43% | 20% | 73% | 53% | 37% | 52% | 47% |
| Monitoring overweight and obesity              | 63% | 43% | 48% | 68% | 50% | 43% | 51% | 54% | 30% | 63% | 68% | 47% |
| Monitoring NCD prevalence and risk factors     | 83% | 70% | 56% | 84% | 67% | 60% | 43% | 77% | 67% | 71% | 68% | 63% |
| Evaluation of programs and policies            | 34% | 37% | 32% | 60% | 57% | 40% | 20% | 33% | 33% | 63% | 20% | 20% |
| Monitoring health inequalities                 | 63% | 73% | 76% | 88% | 60% | 20% | 26% | 60% | 63% | 57% | 28% | 20% |
| Sufficient population nutrition budget         |     |     |     |     |     |     |     |     |     |     |     |     |
| Government-funded research                     | 87% | 27% | 28% | 65% | 56% | 50% | 20% | 49% | 40% | 63% | 20% | 20% |
| Health promotion agency                        | 31% | 27% | 20% | 76% | 35% | 36% | 20% | 86% | 35% | 80% | 33% | 23% |
| Coordination mechanism across government       | 29% | 47% | 50% | 96% | 88% | 50% | 63% | 60% | 24% | 74% | 44% | 27% |
| Coordination mechanism w/ food sector          | 30% | 20% | 52% | 25% | 47% | 20% | 20% | 20% | 20% | 69% | 20% | 37% |

|                                                |     |     |     |     |     |     |     |     |     |     |     |     |
|------------------------------------------------|-----|-----|-----|-----|-----|-----|-----|-----|-----|-----|-----|-----|
| Coordination mechanism with civil society      | 20% | 20% | 72% | 84% | 77% | 20% | 46% | 68% | 30% | 77% | 20% | 37% |
| Health considerations in all food policies     | 51% | 20% | 30% | 25% | 27% | 33% | 20% | 57% | 33% | 86% | 20% | 24% |
| Health impact assessments in non-food policies | 49% | 50% | 20% | 28% | 43% | 36% | 20% | 51% | 40% | 91% | 20% | 20% |

**Table S2.** Ratings for provincial and territorial governments for 38 indicators, Food-EPI Canada, 2017.
